# Supplementary material for: A single-ion-conducting lithium-based montmorillonite interfacial layer for stable lithium–metal batteries
Source: Royal Society of Chemistry journal article supplement (doi:10.1039/d2ta06898b), 2022-01-01
Supplement: d2ta06898b1.pdf [file d2ta06898b1.pdf]

Support information for:

A single-ion-conducting lithium-based montmorillonite interfacial layer for stable  
lithium-metal batteries

*Ting Zeng, Yu Yan, Miao He, Dayue Du, Xiaojuan Wen, Bo Zhou and Chaozhu Shu\**

*College of Materials and Chemistry & Chemical Engineering, Chengdu University of  
Technology, 1#, Dongsanlu, Erxianqiao, Chengdu 610059, Sichuan, P. R. China*

*\*E-mail: czshu@imr.ac.cn; shuchaozhu13@cdut.edu.cn (Chaozhu Shu).*

## 1. Experimental section

**Synthesis of Li-MMT:** Li-MMT is prepared via ion exchange process<sup>[1]</sup>. MMT is dispersed into LiCl solution with vigorous stirring. Li-MMT is obtained using high-speed centrifuge and washed with deionized H<sub>2</sub>O until Cl<sup>-</sup> ions are completely removed as indicated by AgNO<sub>3</sub> test. Li-MMT samples are dried in vacuum oven for 24 hours and are grinded.

**Fabrication of Artificial Li-MMT Protective Layer:** 0.24 g Li-MMT powders and 0.03 g PVDF are dispersed in NMP solvent. After that, the dispersion is doctor bladed on Cu foil followed by drying at 60 °C overnight.

**Material characterization:** X-ray diffraction (XRD) patterns are recorded by using D/MAX-IIIC (Japan) with Cu K $\alpha$  radiation with scanning range from 5° to 80°. High-resolution transmission electron microscope (HRTEM) images are recorded by FEI Tecnai G2. Scanning electron microscopy (SEM) images are recorded by using a ZEISS Gemini 300, and energy dispersive X-ray spectroscopy (EDS) analysis are conducted by Xplore 30.

**Electrochemical measurements:** Li|Li and Li|Cu cells are assembled in an argon-filled glove box (H<sub>2</sub>O < 0.1 ppm, O<sub>2</sub> < 0.1 ppm) with 1 M lithiumbis(trifluoromethanesulfonyl)imide (LiTFSI) in 1,3-dioxolane (DOL)/1,2-dimethoxyethane (DME) (1:1 w/w) as electrolyte and Celgard 2400 as separator. Each cell contains ~30  $\mu$ L electrolyte. Galvanostatic discharge/charge measurements are conducted on Wuhan LAND battery testing system (CT2001A). A certain amount of Li is deposited onto the current collectors and then charged to 1.0 V (vs Li/Li<sup>+</sup>) to

strip the Li for each cycle, during which the Coulombic efficiency (CE) are calculated. Nucleation overpotential is obtained from the galvanostatic discharge curves at a current density of 0.5 mA cm<sup>-2</sup>. To evaluate the cycling stability, 5 mA h cm<sup>-2</sup> Li is first pre-deposited on the current collectors at 0.5 mA cm<sup>-2</sup>. After that, 0.5 mA h cm<sup>-2</sup> Li is stripped from the deposited Li and then plated to Li-MMT-Cu@Li, Cu@Li electrodes at 0.5 mA cm<sup>-2</sup>. Li-O<sub>2</sub> batteries are also assembled in the argon-filled glove box by employing Li-MMT-Cu@Li as anode and Super P as cathode, glass fiber (Whatman, GF/D) as the separator, 1 M LiTFSI in TEGDME solution as electrolyte. The electrochemical impedance spectroscopy (EIS) is carried out on electrochemical workstation (Bio-Logic SP-150) with a voltage amplitude of 10 mV at a frequency range of 0.01-100 kHz. The cyclic voltammetry (CV) test is performed on Li|Cu cells using Li as counter/reference electrode in the potential range of -0.1 V~ 0.5 V at a scan rate of 5.0 mV s<sup>-1</sup>. The linear sweep voltammetry (LSV) test is measured using Li-MMT-Cu@stainless steel (SS) and bare Cu@SS electrodes at a scan rate of 5.0 mV s<sup>-1</sup>.

**Energy density:** The energy density  $E$  (Wh kg<sup>-1</sup>) can be obtained according to the following equations:

$$E = \frac{C \times V \times 1000}{m}$$

where  $V$  is the average discharge voltage (V),  $m$  is the total mass loading of the anode and the cathode, and  $C$  is the discharge capacity (Ah).

When the mass loading of the anode is 1 mg for Li-MMT-Cu@Li electrodes and 18 mg for bare Li electrodes, and the mass loading of the cathode remained the same, i.e.,

1 mg, the energy density of LOBs with Li-MMT-Cu@Li electrodes and bare Li electrodes was calculated as follows, respectively:

$$E_{\text{Li - MMT - Cu@Li electrodes}} = \frac{4.09210 \times 0.8 \times 1000}{2} = 1636.84 \text{ Wh kg}^{-1}$$

$$E_{\text{Bare Li electrodes}} = \frac{12.50990 \times 0.8 \times 1000}{19} = 526.73 \text{ Wh kg}^{-1}$$

## 2. Supporting Results and Figures

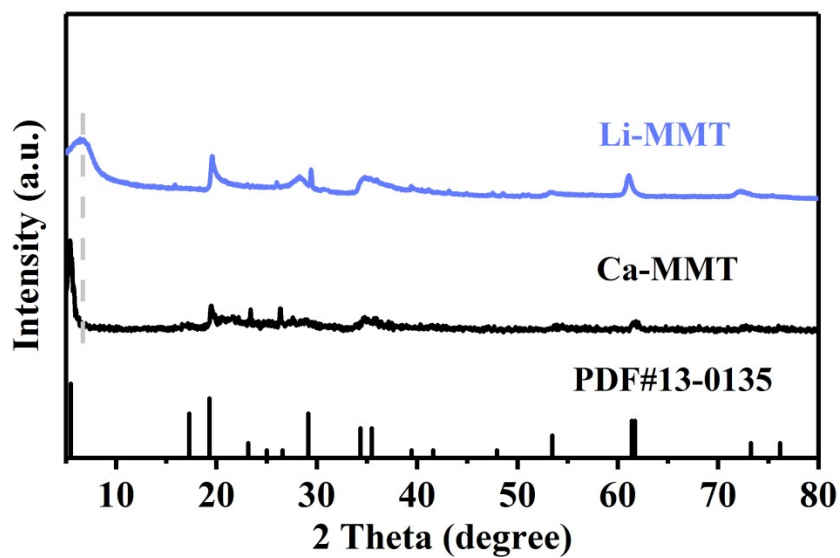

Figure S1. XRD patterns of Ca-MMT and Li-MMT.

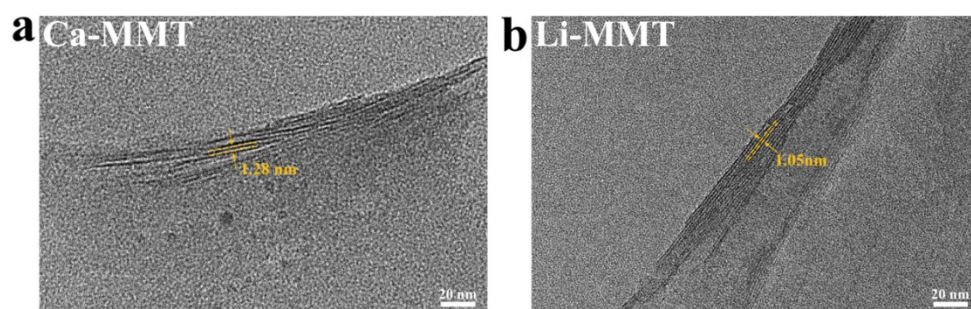

Figure S2. HRTEM images of Ca-MMT and Li-MMT.

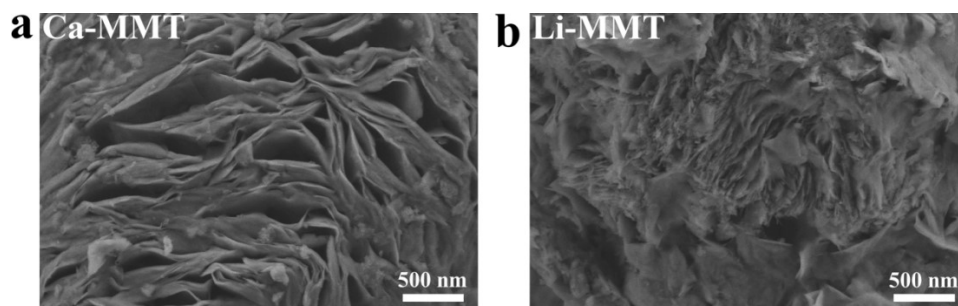

Figure S3. SEM images of Ca-MMT and Li-MMT.

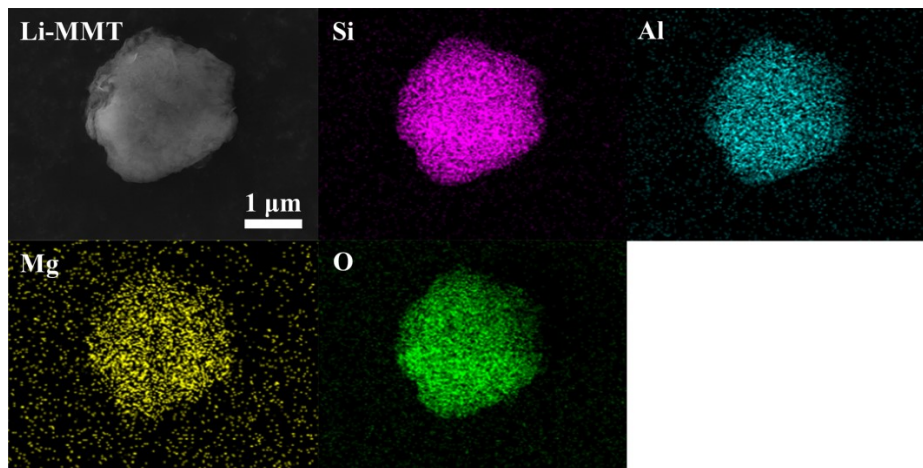

Figure S4. EDS elemental mapping images of Li-MMT.

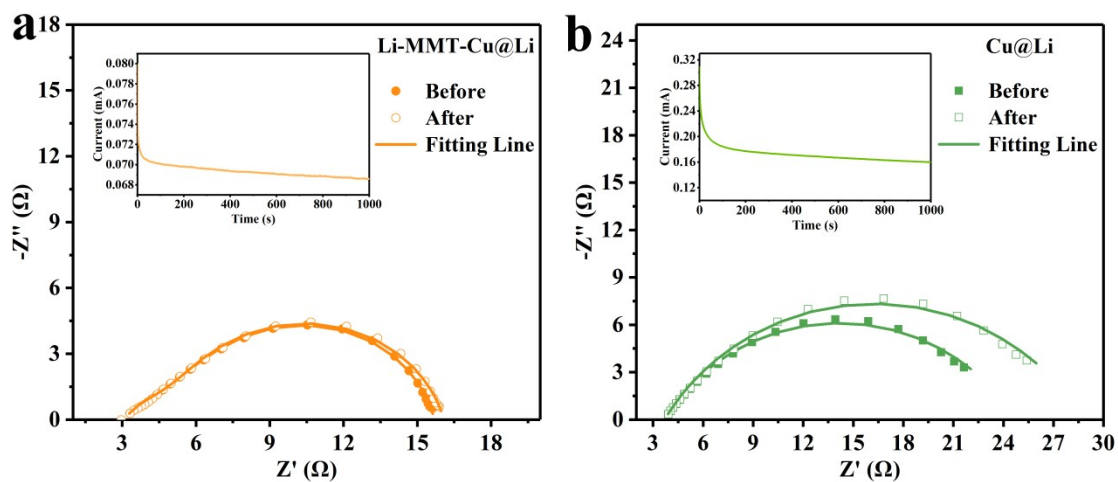

Figure S5. Nyquist plots of (a) Li-MMT-Cu@Li and (b) Cu@Li symmetric cells before/after polarization. The inset is the chronoamperogram of different symmetric cells with an applied voltage of 10 mV.

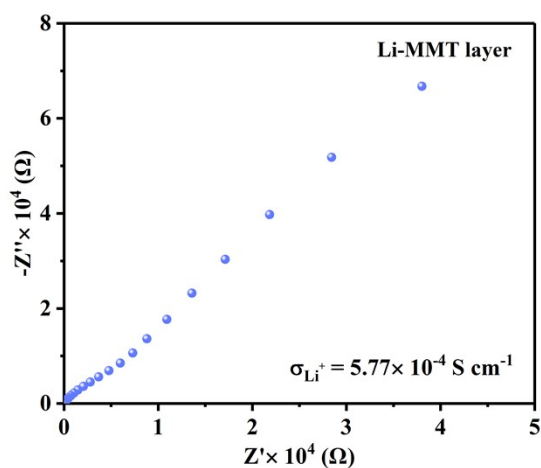

Figure S6. Nyquist plot of Li-MMT@SS|SS cells and the corresponding ionic conductivity.

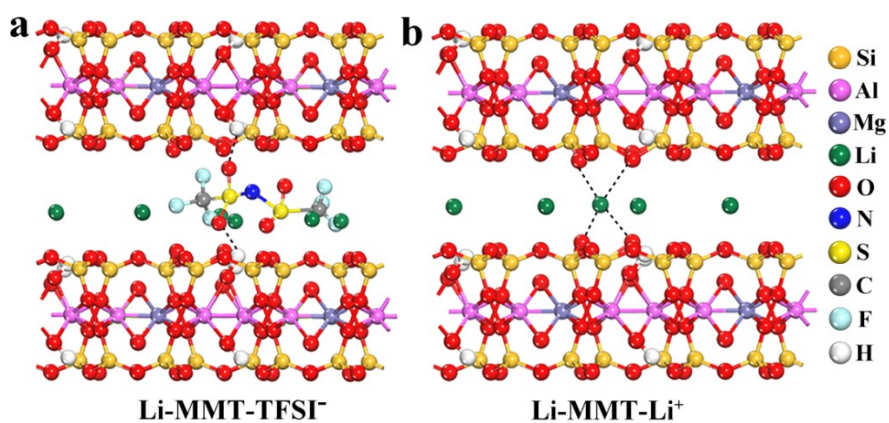

Figure S7. The adsorption configurations of Li-MMT-TFSI<sup>-</sup> and Li-MMT-Li<sup>+</sup> for density function theory (DFT) calculations.

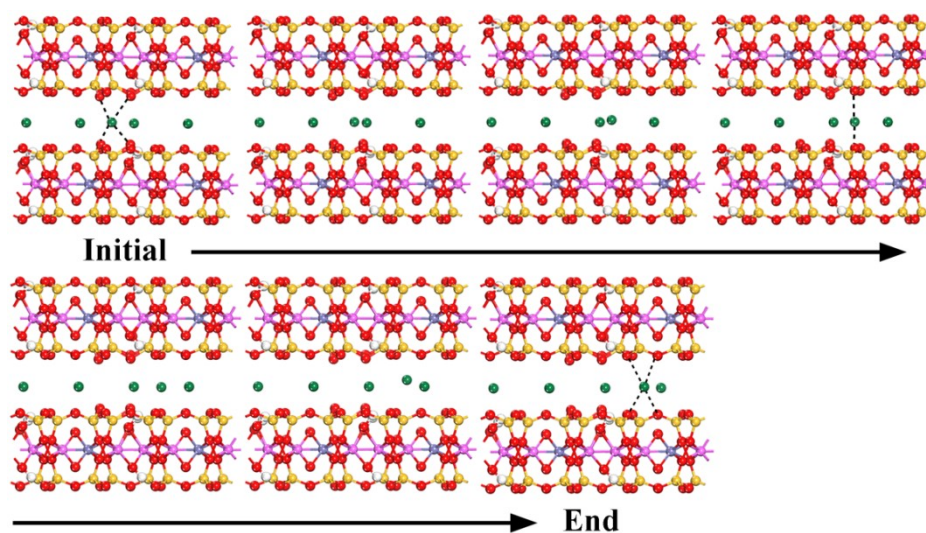

Figure S8. The specific migration pathway of  $\text{Li}^+$  ions

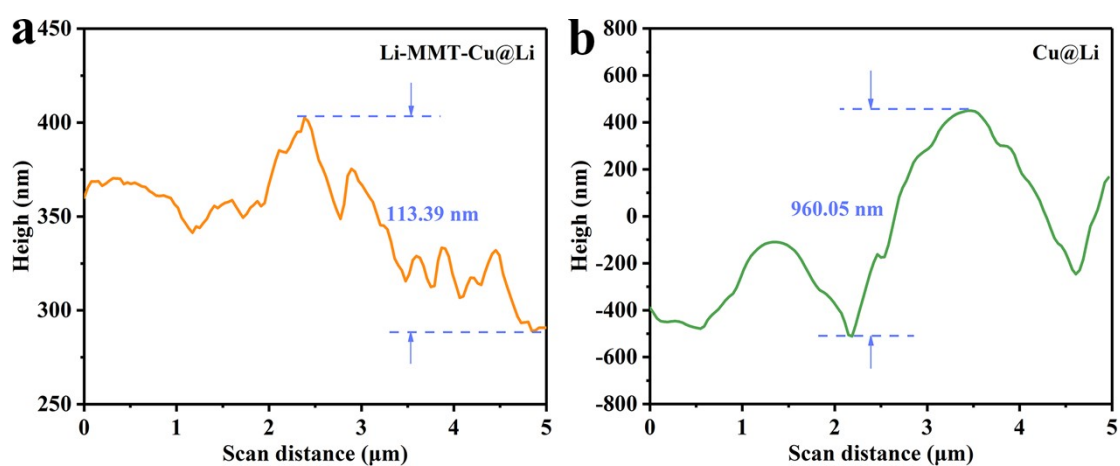

Figure S9. The height curves in AFM topography images of the surface of (a) Li-MMT-Cu@Li electrodes and (b) Cu@Li electrodes after plating  $5 \text{ mAh cm}^{-2}$  Li.



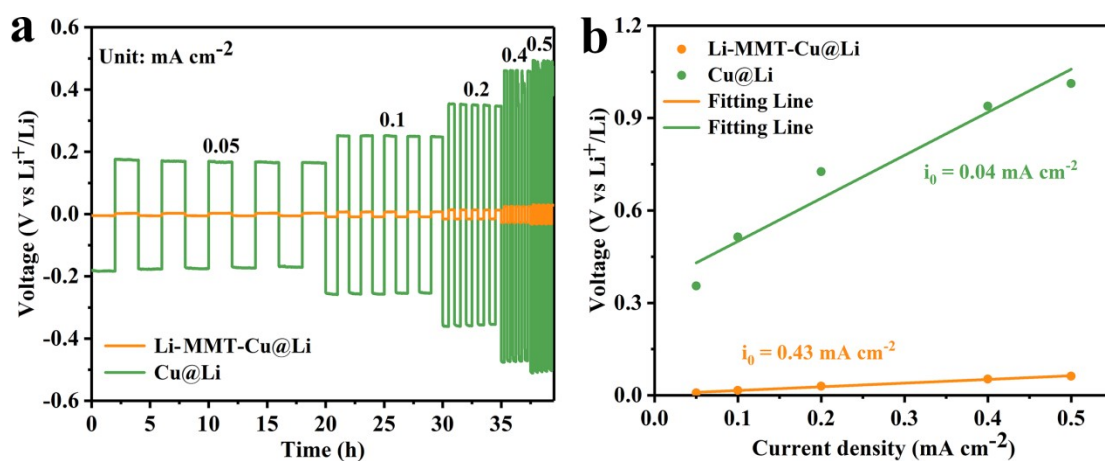

Figure S10. (a) Galvanostatic discharge/charge under different current density from 0.05 to 0.5 mA cm<sup>-2</sup> with a fixed areal capacity of 0.1 mAh cm<sup>-2</sup> and (b) the corresponding exchange current density.

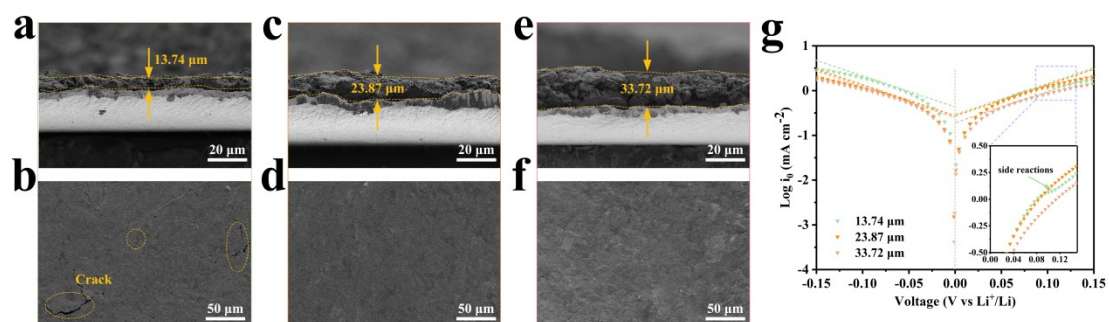

Figure S11. Cross-sectional SEM images of Li-MMT layer with different thickness of (a) 13.74 μm, (c) 23.87 μm and (e) 33.72 μm. Top-view SEM images of Li-MMT-Cu@Li electrodes with (b) 13.74 μm, (d) 23.87 μm and (f) 33.72 μm after depositing 5 mAh cm<sup>-2</sup> Li under 0.5 mA cm<sup>-2</sup>. (g) Tafel curves of Li|Li symmetric cells.

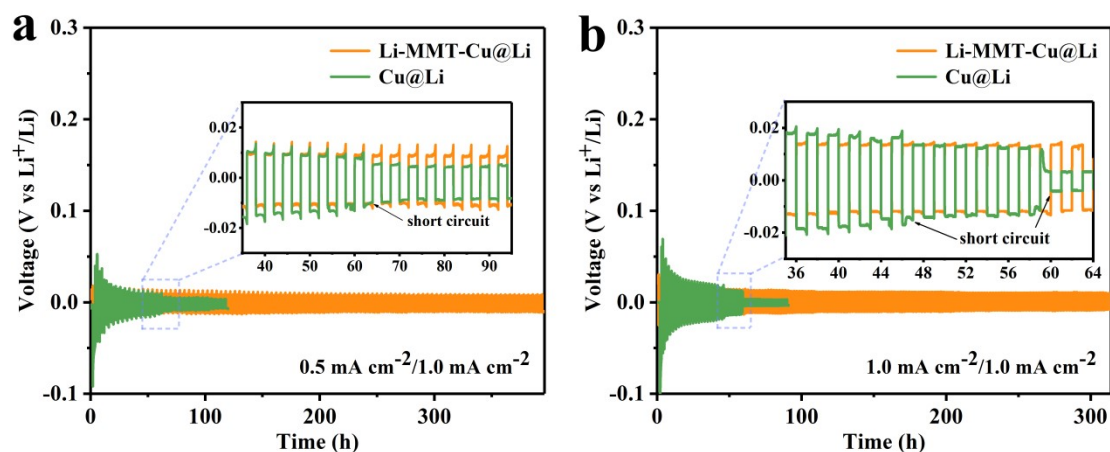

Figure S12. Long-term cycling and voltage profiles of Li|Li symmetric cells with Cu@Li and Li-MMT-Cu@Li electrodes at (a)  $0.5 \text{ mA cm}^{-2}/1.0 \text{ mA cm}^{-2}$  and (b)  $1.0 \text{ mA cm}^{-2}/1.0 \text{ mA cm}^{-2}$ . The inset is the magnified voltage profiles at selected cycles.

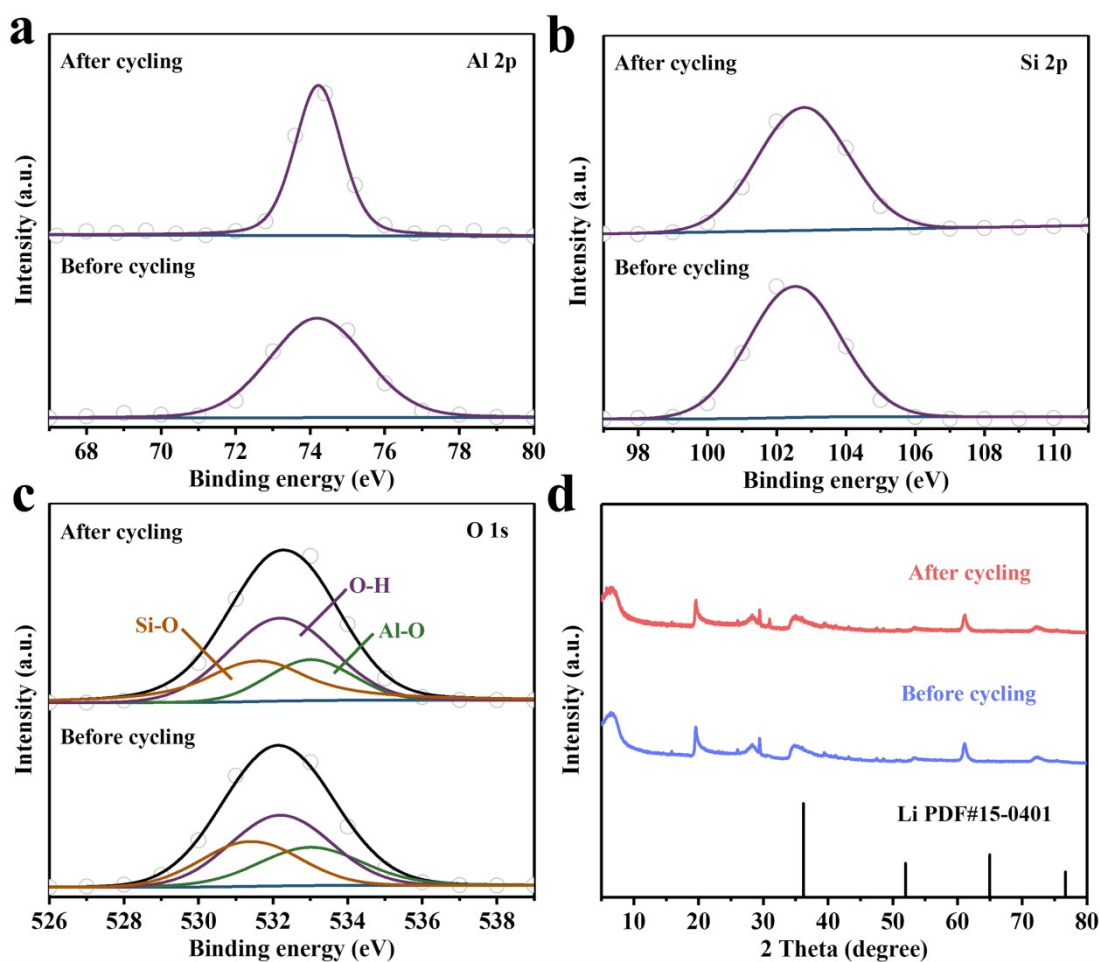

Figure S13. XPS spectra of (a) Al 2p, (b) Si 2p and (c) O 1s in the Li-MMT protective

layer before and after 50 cycles. (d) XRD patterns of the Li-MMT protective layer before and after 50 cycles.

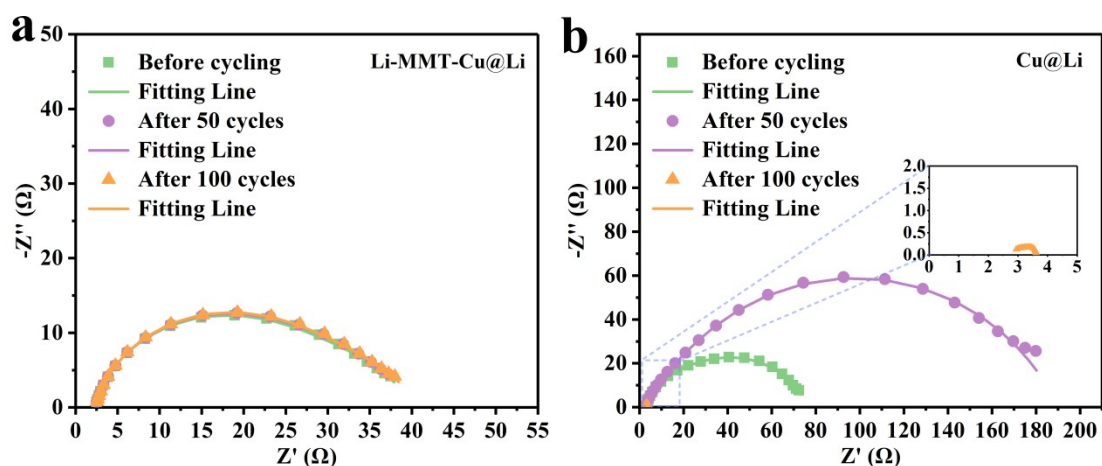

Figure S14. Electrochemical impedance spectroscopy of Li|Li symmetric cells with (a) Li-MMT-Cu@Li and (b) Cu@Li electrodes before (i.e., static placing for 1 day before testing) and after 50 cycles and 100 cycles.

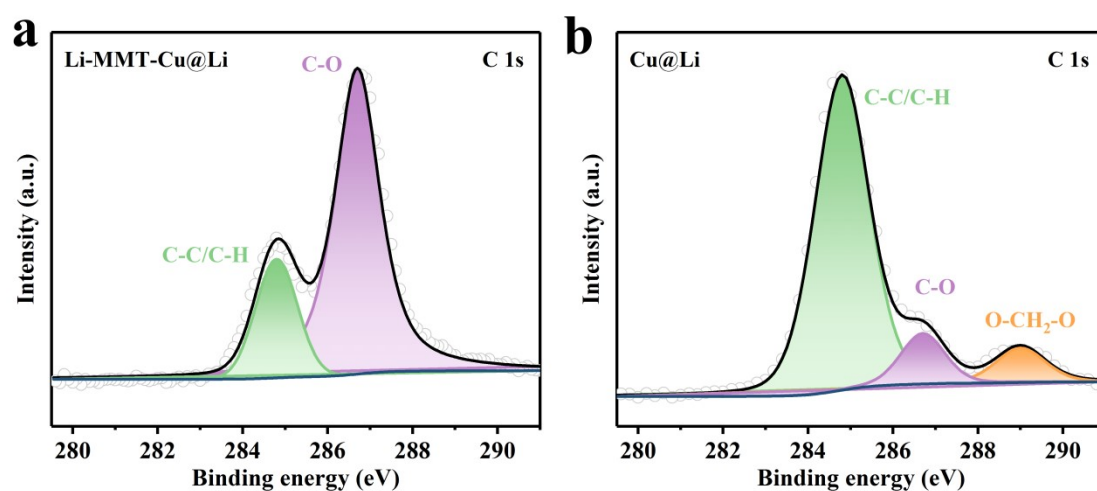

Figure S15. C 1s XPS spectra of the surface of (a) Li-MMT-Cu@Li electrodes and (b) Cu@Li electrodes after depositing 5 mAh cm<sup>-2</sup> Li.

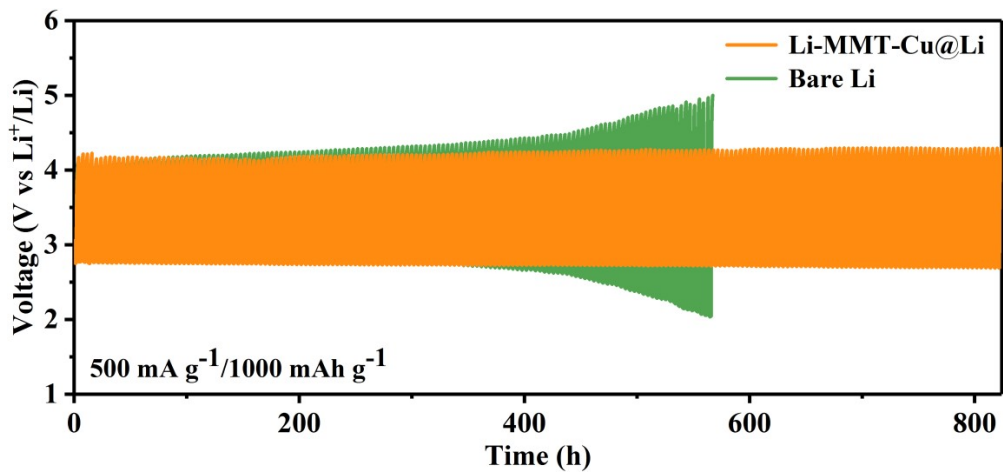

Figure S16. Cycle performance of both electrodes with a cutoff capacity of 1000 mAh g<sup>-1</sup> at a current density of 500 mA g<sup>-1</sup>.

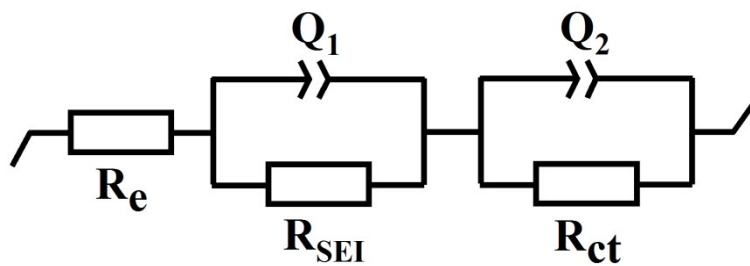

Figure S17. Equivalent circuit of the electrochemical impedance spectroscopy.

Supplementary Table 1. Fitting results of both electrodes with and without Li-MMT layer before (i.e., static placing for 2 hours) and after 50 cycles at 0.5 mA cm<sup>-2</sup> and 0.5 mAh cm<sup>-2</sup>.

|                            |                  | Before cycling<br>(static placing<br>for 2 hours) | After cycling |
|----------------------------|------------------|---------------------------------------------------|---------------|
| Li-MMT-Cu@Li<br>electrodes | R <sub>SEI</sub> | 0.42                                              | 0.44          |
|                            | R <sub>ct</sub>  | 13.15                                             | 11.64         |
| Cu@Li<br>electrodes        | R <sub>SEI</sub> | 6.09                                              | 26.99         |
|                            | R <sub>ct</sub>  | 56.08                                             | 195.30        |

Supplementary Table 2. Fitting results of both electrodes with and without Li-MMT layer before (i.e., static placing for 1 day) and after 50 cycles and 100 cycles at 0.5 mA cm<sup>-2</sup> and 0.5 mAh cm<sup>-2</sup>.

|                            |                  | Before cycling<br>(static placing<br>for 1 day) | After 50 cycles | After 100 cycles |
|----------------------------|------------------|-------------------------------------------------|-----------------|------------------|
| Li-MMT-Cu@Li<br>electrodes | R <sub>SEI</sub> | 12.96                                           | 13.10           | 13.12            |
|                            | R <sub>ct</sub>  | 24.69                                           | 24.46           | 24.45            |
| Cu@Li<br>electrodes        | R <sub>SEI</sub> | 61.75                                           | 183.70          | 0.46             |
|                            | R <sub>ct</sub>  | 11.56                                           | 3.77            | 0.35             |

Supplementary Table 3. The comparison of the electrochemical performances between our work and other reported works.

| Strategy                                                                | Current density (mA cm <sup>-2</sup> ) | Areal capacity (mAh cm <sup>-2</sup> ) | Overpotential (mV) | Cycle number (n) | Reference |
|-------------------------------------------------------------------------|----------------------------------------|----------------------------------------|--------------------|------------------|-----------|
| PDA host                                                                | 0.1                                    | 0.2                                    | ~50                | 200              | Ref. [2]  |
| MXene host                                                              | 0.5                                    | 0.5                                    | ~25                | 175              | Ref. [3]  |
| Vo-TiO <sub>2</sub> /Ti <sub>3</sub> C <sub>2</sub> T <sub>x</sub> host | 0.1                                    | 0.1                                    | 19                 | 350              | Ref. [4]  |
| 5% Lithium nitrate                                                      | 0.5                                    | 0.5                                    | 52                 | 150              | Ref. [5]  |
| 20 mM Boric acid                                                        | 0.25                                   | 0.5                                    | ~80                | 215              | Ref. [6]  |
| 0.1 M LiDFP and 0.4 M LiBOB                                             | 0.5                                    | 0.5                                    | ~50                | 140              | Ref. [7]  |
| Artificial dual SEI                                                     | 0.5                                    | 0.5                                    | 12                 | 200              | Ref. [8]  |
| PVDF-HFP film                                                           | 0.5                                    | 0.5                                    | ~48                | 250              | Ref. [9]  |
| Li-MMT layer                                                            | 0.5                                    | 0.5                                    | 10                 | 650              | This work |

## Reference

- [1] Kim, S., et al., Preparation and ion-conducting behaviors of poly (ethylene oxide)-composite electrolytes containing lithium montmorillonite. *Solid State Ionics*, 2007, 178(13-14): 973-979.
- [2] He, Y., et al., Polydopamine coating layer modified current collector for dendrite-free Li metal anode. *Energy Storage Materials*, 2019, 23: 418-426.
- [3] Wei, C. L., et al., Isotropic Li nucleation and growth achieved by an amorphous liquid metal nucleation seed on MXene framework for dendrite-free Li metal anode. *Energy Storage Materials*, 2020, 26: 223-233.
- [4] Yan, Y., et al., Long-cycling lithium-oxygen batteries enabled by tailoring Li nucleation and deposition via lithiophilic oxygen vacancy in  $\text{Vo-TiO}_2/\text{Ti}_3\text{C}_2\text{T}_x$  composite anodes. *Journal of Energy Chemistry*, 2022, 65: 654-665.
- [5] Tan, S. J., et al., Nitriding-interface-regulated lithium plating enables flame-retardant electrolytes for high-voltage lithium metal batteries. *Angewandte Chemie International Edition*, 2019, 131(23): 7884-7889.
- [6] Huang, Z. M., et al., Protecting the Li-metal anode in a Li-O<sub>2</sub> battery by using boric acid as an SEI-forming additive. *Advanced Materials*, 2018, 30(39): 1803270.
- [7] Zheng, H., et al., Lithium difluorophosphate-based dual-salt low concentration electrolytes for lithium metal batteries. *Advanced Energy Materials*, 2020, 10(30): 2001440.
- [8] Guo, W., et al., Artificial dual solid-electrolyte interfaces based on in situ organothiol transformation in lithium sulfur battery. *Nature communications*,

2021, 12(1): 1-13.

- [9] Xiao, Y., et al., Waterproof lithium metal anode enabled by cross-linking encapsulation. *Science Bulletin*, 2020, 65(11): 909-916.
